# Supplementary material
Source: PubMed Central journal article supplement (PMC3807431)
Supplement: JB.00586-13_zjb999092838so1.pdf [file JB.00586-13_zjb999092838so1.pdf]

Table S1. Strains and plasmids used in this study.

| Strain | Description                                                      | Source or Reference |
|--------|------------------------------------------------------------------|---------------------|
| MG1655 | Wild-type <i>E. coli</i> K-12                                    | D. Jin (NCI)        |
| DJ480  | MG1655 $\Delta lacX_{74}$                                        | D. Jin (NCI)        |
| CS100  | DJ480 <i>sgrS::cat-sacB</i>                                      | [1]                 |
| CS104  | CS100 $\Delta sgrS$                                              | [1]                 |
| JH111  | CS104 $\lambda attB::lacI^q$ - $P_{N25tet^R}$ -spec <sup>R</sup> | [2]                 |
| CS175  | JH111 $\Delta ptsG::cat$                                         | This study          |
| JH258  | JH111 <i>ptsG'</i> - <i>'lacZ</i>                                | [2]                 |
| DB138  | JH111 $\Delta hfq::cat$                                          | This study          |
| DB148  | JH111 <i>rne131 zce-726::Tn10</i>                                | This study          |
| DB151  | DB138 <i>ptsG'</i> - <i>'lacZ</i>                                | This study          |
| LT2    | Wild-type <i>Salmonella enterica</i> serovar Typhimurium LT2     | Slauch, J.M (UIUC)  |
| DB111  | LT2 $\Delta sgrS::tet$                                           | This study          |
| DB140  | LT2 <i>sgrS1</i>                                                 | This study          |
| DB142  | LT2 <i>sgrS2</i>                                                 | This study          |
| DB143  | LT2 <i>sgrS3</i>                                                 | This study          |
| DB153  | LT2 <i>sgrT-3XFLAG</i>                                           | This study          |

| Plasmids | Genotype                                     | Primers            | Reference  |
|----------|----------------------------------------------|--------------------|------------|
| pBRCS12  | Vector                                       | N/A                | [1]        |
| pBRCS22  | $P_{LlacO}$ - <i>sgrS</i>                    | N/A                | [1]        |
| pBRCS27  | $P_{LlacO}$ - <i>sgrS1</i>                   | N/A                | [1]        |
| pBRCS30  | $P_{LlacO}$ - <i>sgrS2</i>                   | N/A                | [1]        |
| pBRCS31  | $P_{LlacO}$ - <i>sgrS3</i>                   | N/A                | [1]        |
| pBRDB12  | $P_{LlacO}$ - <i>sgrS19</i>                  | O-DB199<br>O-DB200 | This study |
| pLCV1    | $P_{LlacO}$ - <i>sgrS</i> ( <i>E. coli</i> ) | N/A                | [1]        |
| pZADB01  | $P_{Ltet}$ - <i>sgrS</i>                     | O-DB151<br>O-DB152 | This study |
| pZADB05  | $P_{Ltet}$ - <i>sgrS14</i>                   | O-DB169            | This study |
| pZADB12  | $P_{Ltet}$ - <i>sgrS19</i>                   | O-DB188<br>O-DB189 | This study |
| pZADB18  | $P_{Ltet}$ - <i>sgrS20</i>                   | O-DB197<br>O-DB198 | This study |
| pZADB19  | $P_{Ltet}$ - <i>sgrS21</i>                   | O-DB199<br>O-DB200 | This study |
| pZADB20  | $P_{Ltet}$ - <i>sgrS22</i>                   | O-DB201<br>O-DB202 | This study |
| pZADB21  | $P_{Ltet}$ - <i>sgrS23</i>                   | O-DB203<br>O-DB204 | This study |
| pZEDB03  | $P_{LlacO}$ - <i>ptsG'</i> - <i>'gfp</i>     | O-DB163<br>O-DB164 | This study |
| pZEMB11  | $P_{LlacO}$ - <i>manX'</i> - <i>'gfp</i>     | MBP2L<br>MBP2R44   | This study |

|         |                                                 |                   |            |
|---------|-------------------------------------------------|-------------------|------------|
| pZEMB15 | P <sub>LlacO</sub> - <i>yigL</i> '-' <i>gfp</i> | MBP16F2<br>MBPR41 | This study |
|---------|-------------------------------------------------|-------------------|------------|

1. Wadler, C.S. and C.K. Vanderpool, *Characterization of homologs of the small RNA SgrS reveals diversity in function*. Nucleic Acids Res, 2009. **37**(16): p. 5477-85.
2. Rice, J.B. and C.K. Vanderpool, *The small RNA SgrS controls sugar-phosphate accumulation by regulating multiple PTS genes*. Nucleic Acids Research, 2011. **39**(9): p. 3806-3819.
