# Supplementary material
Source: PubMed Central journal article supplement (PMC3807431)
Supplement: JB.00586-13_zjb999092838so3.pdf [file JB.00586-13_zjb999092838so3.pdf]

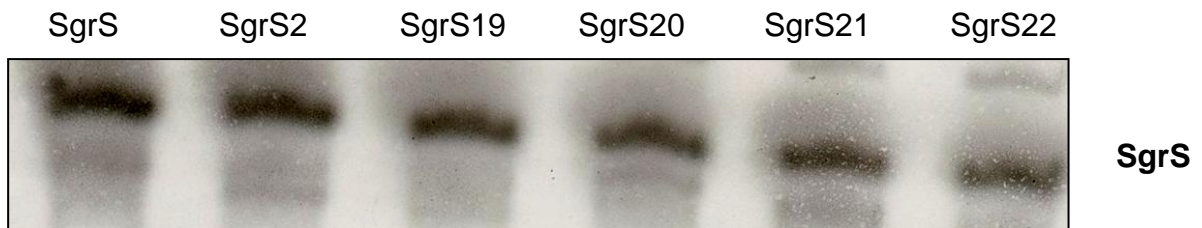

**Figure S2. Levels of SgrS RNA from wild-type and translation-impaired *sgrS* alleles.** Wild-type (JH111) cells containing the  $P_{tet}$ -*sgrS* alleles described in Fig. 2A and Fig. 3A were grown to mid-logarithmic phase, induced with 30ng/ml aTc and total RNA extracted 20 min. after induction. The samples were subjected to Northern blot using a biotinylated SgrS probe.

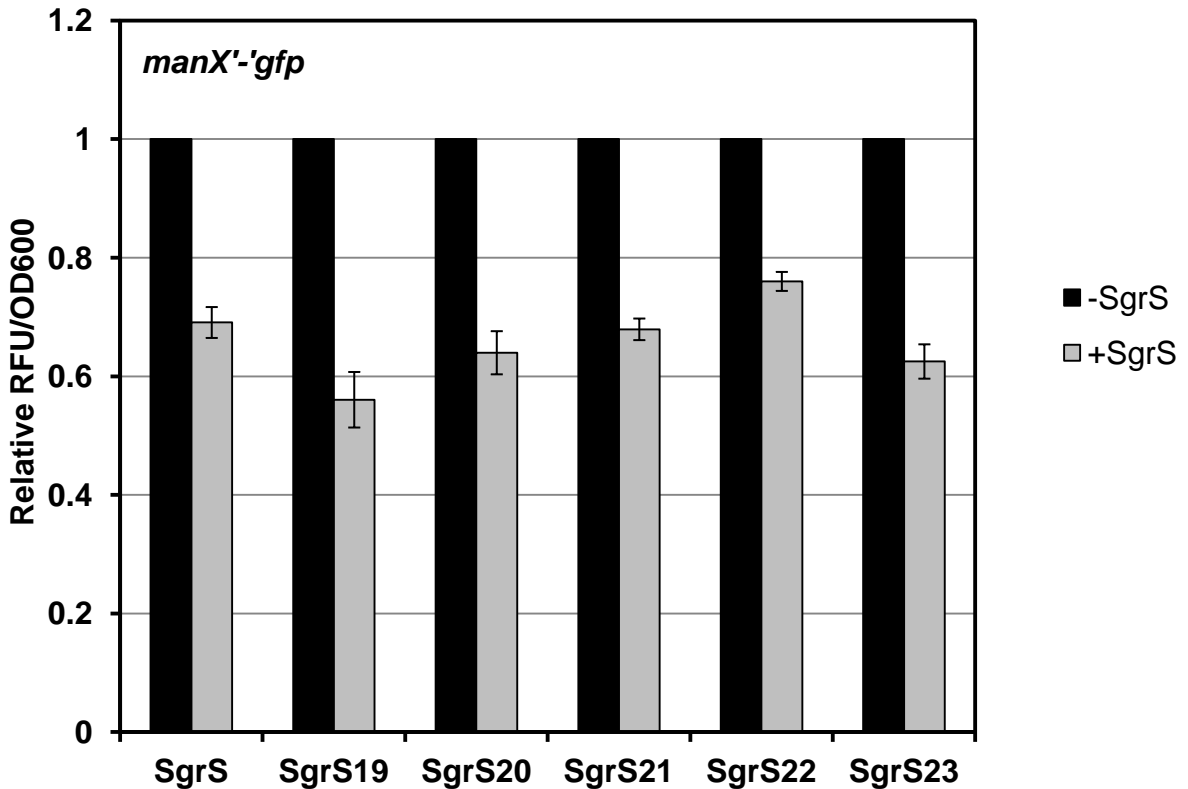

**Figure S3. Translational regulation of *manX* by wild-type and translation-impaired *sgrS* alleles.** Cultures of JH111 harboring the plasmid carrying  $P_{lac}$ -*manX*'-'*gfp* (pZEMB11) and a compatible plasmid with the  $P_{tet}$ -*sgrS* alleles indicated in Fig. 3A were grown to mid-logarithmic phase and expression of *manX*'-'*gfp* and SgrS induced with 0.75mM IPTG and 30ng/ml aTc, respectively. Black bars represent cultures having only the translational fusion induced (-SgrS). Gray bars represent cultures having both the translational fusion and the *sgrS* allele induced (+SgrS). Kinetic fluorescence assays were performed, and the Relative Fluorescence Units (RFU) were measured and normalized to culture density ( $OD_{600}$ ). The RFU/ $OD_{600}$  value of cultures that only induced for the translational fusion was normalized to 1.

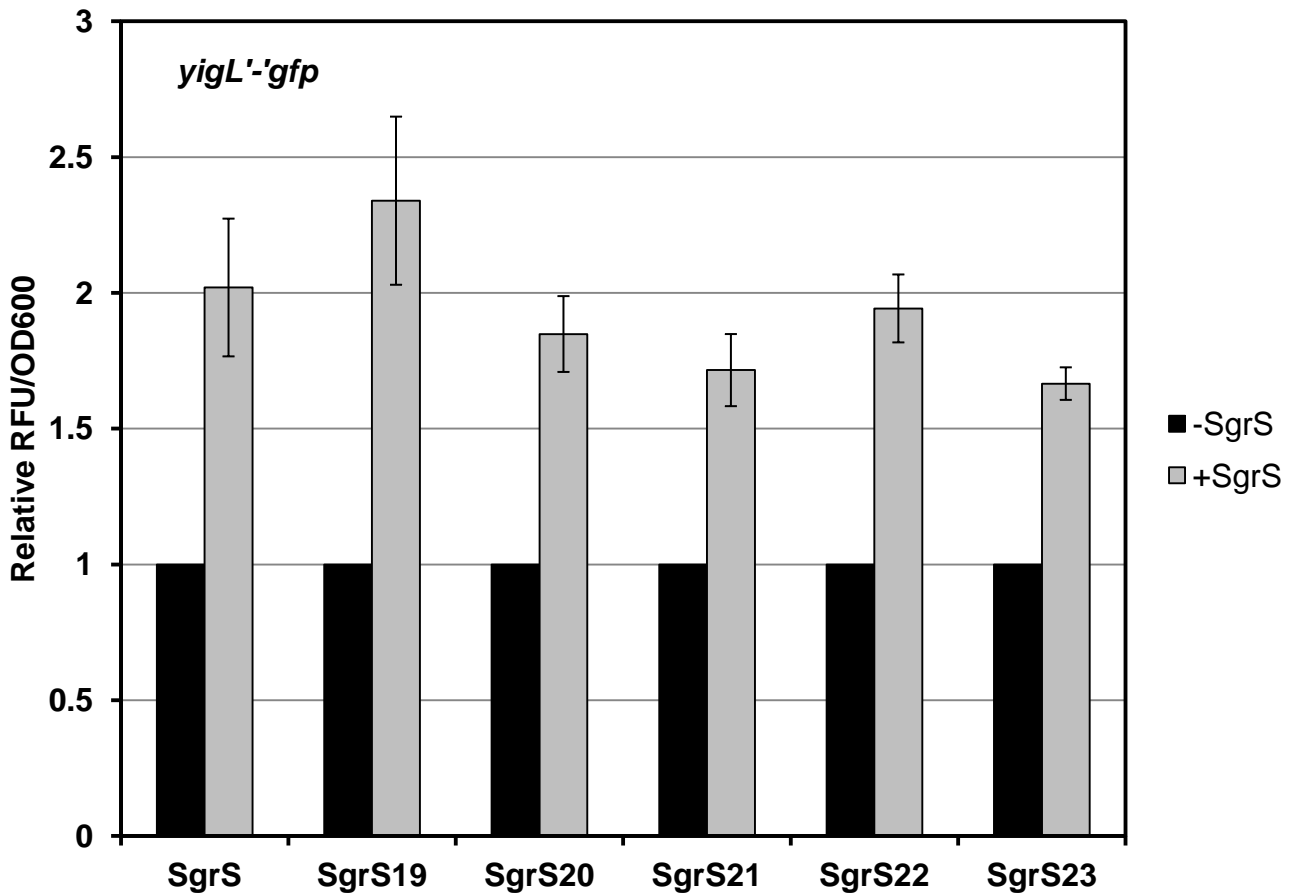

**Figure S4. Translational regulation of *yigL* by wild-type and translation-impaired *sgrS* alleles.** Cultures of JH111 harboring the plasmid carrying  $P_{lac}$ -*yigL*'-'*gfp* (pZEMB15) and a compatible plasmid with the  $P_{tet}$ -*sgrS* alleles indicated in A were growth to mid-logarithmic phase and expression of *yigL*'-'*gfp* and SgrS induced with 0.75mM IPTG and 30ng/ml aTc, respectively. Black bars represent cultures having only the translational fusion induced (-SgrS). Gray bars represent cultures having both the translational fusion and the *sgrS* allele induced (+SgrS). Kinetic fluorescence assays were performed, and the Relative Fluorescence Units (RFU) were measured and normalized to culture density ( $OD_{600}$ ). The RFU/ $OD_{600}$  value of cultures that only induced for the translational fusion was normalized to 1.

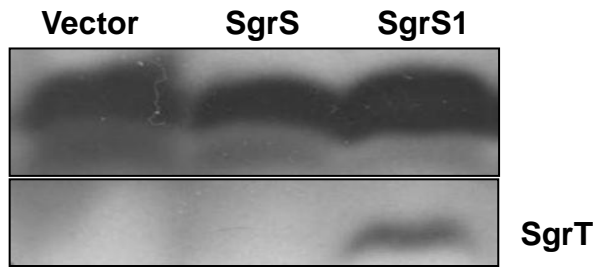

**Figure S5. SgrT produced by wild-type and base pairing-deficient *sgrS* alleles.** Cultures of JH111 containing the  $P_{lac}$ -plasmid vector (pBRCS12), *S. Typhimurium* wild-type *sgrS* plasmid (pBRCS22) or *sgrS1* plasmid (pBRCS27) were grown to mid-logarithmic phase. Transcription of  $P_{lac}$ -*sgrS* alleles was induced, total protein extracted and subject to Western blot as described in Fig. 4B.

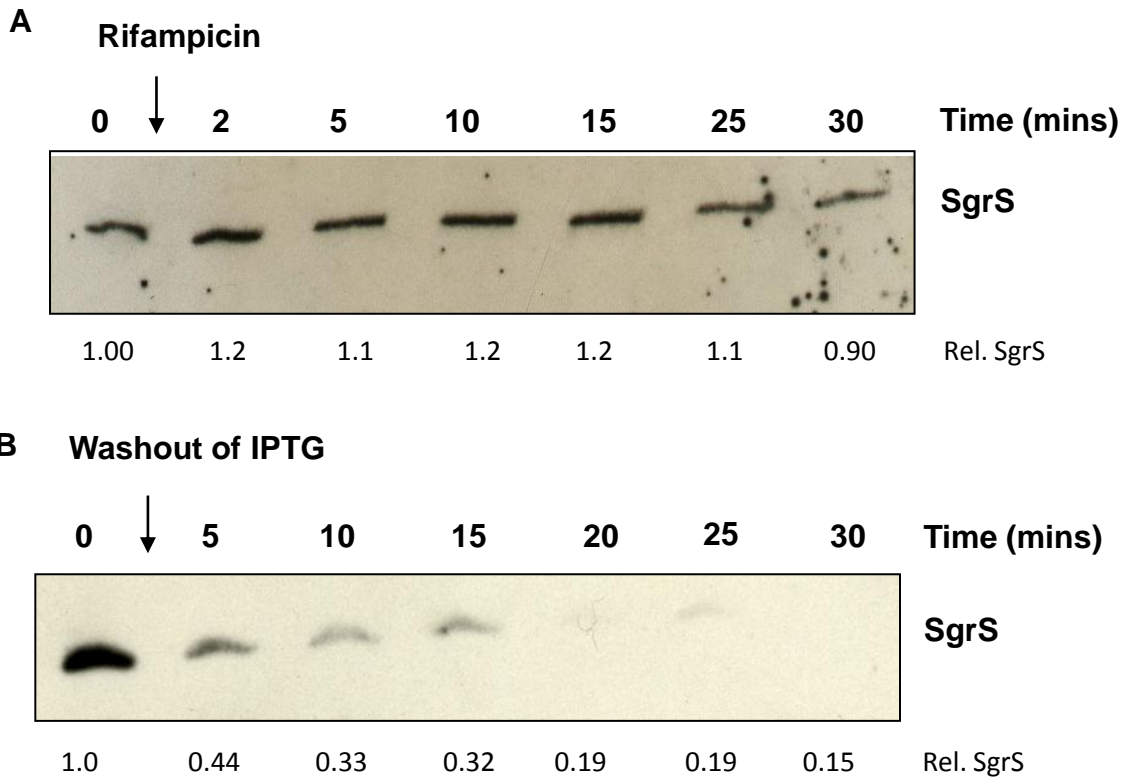

**Figure S6. Analysis of SgrS stability** A) A culture of JH111 containing the *S. Typhimurium* wild-type *sgrS* plasmid (pBRCS22) was grown to mid-logarithmic phase, induced with 0.1mM IPTG for 10 min. and total RNA extracted (0 min. time point). Rifampicin was added to inhibit both SgrS and target synthesis, and total RNA extracted at the time points indicated. RNA samples were subjected to Northern blot and probed for SgrS. B) A culture of JH111 harboring pBRCS22 was grown to mid-logarithmic phase, induced with 0.1mM IPTG for 10 min. and total RNA extracted (0 min. time point). The inducer IPTG was then washed out by filtration and re-suspended in same volume of media to stop SgrS synthesis, but allow for continued target mRNA transcription. Total RNA was extracted at the time points indicated. RNA samples were subjected to Northern blot and probed for SgrS.
